# Supplementary material
Source: Elsevier journal article supplement (https://www.sciencedirect.com/science/article/pii/S2387020621001303)
Supplement: mmc1 [file S2387020621001303:mmc1.doc]

**APÉNDICE: definición de las variables.**

*Características clínicas*

Además del sexo, se registraron diversas variables cuando en la historia clínica constaba su diagnóstico previamente al de amiloidosis cardiaca, como los factores clásicos de riesgo cardiovascular (hipertensión arterial, hipercolesterolemia, diabetes mellitus y tabaquismo), varios eventos cardiovasculares [ingreso previo por insuficiencia cardiaca, fibrilación/flutter auricular, arritmias ventriculares, síncope, implante de marcapasos, cardiopatía isquémica (definida por una prueba evaluativa positiva para isquemia, al menos una estenosis coronaria ≥ 50% o el ingreso por un síndrome coronario agudo), cirugía cardiaca, enfermedad cerebrovascular y enfermedad tromboembólica venosa) y otras comorbilidades (enfermedad pulmonar obstructiva crónica y neuropatía periférica). También se recogió la historia previa de afectación de tejidos blandos, incluyendo el diagnóstico de estenosis canal lumbar por tomografía computerizada o resonancia magnética, el diagnóstico de síndrome de túnel carpiano por estudio de conducción nerviosa, la intervención quirúrgica de la contractura de Dupuytren y el diagnóstico de tendinopatía del manguito rotador, bíceps proximal o cuádriceps por radiografía simple, ecografía o resonancia magnética.

Por último, también se recogieron los datos referentes a la situación clínica del paciente (clase funcional NYHA y síntomas de angina de esfuerzo), a la exploración física [índice de masa corporal, tensión arterial, frecuencia cardiaca y signos de congestión pulmonar y sistémica (definidos por la presencia de hipofonesis o crepitantes húmedos a la auscultación pulmonar, ingurgitación venosa yugular o edema de miembros inferiores) y el tratamiento médico.

*Estudio genético*

Se realizó secuenciación de la región codificante del gen de la transtirretinaatodos los pacientes con amiloidosis cardiaca por transtirretina para la búsqueda de mutaciones. El ADN se extrajo de una muestra de sangre y fue amplificado utilizando la reacción en cadena de la polimerasa.

*Pruebas de* *laboratorio*

Se obtuvieron múltiples parámetros de laboratorio del primer análisis disponible desde el diagnóstico. Para la estimación del índice de filtrado glomerular se utilizó la fórmula de Cockcroft-Gault.

*Gammagrafía ósea*

En todos los casos el radiofármaco utilizado fue el ácido 3,3-difosfono-1,2-propanodicarboxílico marcado con 99mTc. Se consideró el resultado positivo cuando el grado de captación cardiaca según el score de Perugini fue 2 o 31.

*Estudios histológicos*

Se recogieron todas las biopsias cardiacas y extracardiacas realizadas. El diagnóstico de amiloidosis se estableció en los casos de positividad con la tinción de Rojo Congo. El subtipo de amiloide se caracterizó con la realización de técnicas inmunohistoquímicas, utilizando anticuerpos dirigidos contra la transtirretina, la cadena ligera lambda y la cadena ligera kappa. En algunos casos de resultado inmunohistoquímico dudoso, se llevó a cabo un análsis proteómico por espectrometría de masas.

*Electrocardiograma*

Se analizó el primer electrocardiograma disponible tras el diagnóstico de amiloidosis cardiaca. Se registró el ritmo, excluyendo del resto de análisis a los pacientes con estimulación ventricular por marcapasos2. Se obtuvieron la duración del intervalo PR, del complejo QRS y del intervalo QTc corregido por la fórmula de Bazzet3, además de la presencia de algún bloqueo de rama (hemibloqueo de rama izquierda, bloqueo completo de rama izquierda, bloqueo completo de rama derecha o bloqueo bifascicular). Se calcularon los índices de Cornell4 y Sokolow-Lyon5, así como el voltaje total del complejo QRS en las derivaciones precordiales y en las derivaciones de los miembros6. Se recogieron la presencia de hipertrofia ventricular izquierda (definida por un índice de Cornell > 2.0 mV en mujeres y > 2.8 mV en hombres o un índice de Sokolow-Lyon ≥ 3.5mV)4,5 y de algún patrón de pseudoinfarto (definido por la existencia de ondas Q patológicas en al menos 2 derivaciones consecutivas en ausencia de historia previa de infarto de miocardio), excluyendo en ambos casos a los pacientes con bloqueo completo de rama izquierda7. Se establecieron como criterios de bajos voltajes un sumatorio de la amplitud total del complejo QRS en las derivaciones de los miembros ≤ 0.5 mV7, en las derivaciones precordiales ≤ 1.0 mV7 o un índice de Sokolow-Lyon ≤ 1.5 mV8.

*Imagen cardiaca*

Las diferentes mediciones ecocardiográficas se realizaron utilizando las recomendaciones de la *American Society of Echocardiography (ASE)*9,10. Además, se evaluaron el patrón de hipertrofia ventricular izquierda según lo descrito con anterioridad11, el patrón de flujo transmitral y la presencia de alteraciones segmentarias de la contractilidad, de un aspecto granular del miocardio (*sparkling*)12 y de un grado igual o mayor a ligero de valvulopatía aórtica, insuficiencia mitral, insuficiencia tricuspídea o derrame pericárdico.

En los casos en los que se realizó resonancia magnética cardiaca se recogieron la fracción de eyección ventricular izquierda, el patrón de hipertrofia ventricular izquierda11, los grosores del septo intraventricular, de la pared posterior y el máximo, la presencia de algún patrón de realce tardío y la descripción de una cinética de gadolinio alterada13.

*Desenlaces clínicos*

Se registraron la mortalidad y sus causas, el número de ingresos hospitalarios junto con el episodio que los motivó, las visitas a urgencias por insuficiencia cardiaca que no implicaron ingreso hospitalario y la ocurrencia de otros eventos cardiovasculares definidos de igual modo que en el apartado de características basales.

**BIBLIOGRAFÍA DEL APÉNDICE**

1. Perugini E, Guidalotti PL, Salvi F, et al. Noninvasive etiologic diagnosis of cardiac amyloidosis using 99mTc-3,3-diphosphono-1,2-propanodicarboxylic acid scintigraphy. J Am Coll Cardiol. 2005;46:1076-1084.

2. González-López E, Gagliardi C, Domínguez F, et al. Clinical characteristics of wild-type transthyretin cardiac amyloidosis: disproving myths. Eur Heart J. 2017;38:1895-1904.

3. Bazett HC. An analysis of the time-relations of electrocardiograms. Heart. 1920;7:353-70.

4. Casale PN, Devereux RB, Alonso DR, et al. Improved sex-specific criteria of left ventricular hypertrophy for clinical and computer interpretation of electrocardiograms: validation with autopsy findings. Circulation. 1987;75:565-72.

5. Sokolow M, Lyon T. The ventricular complex in left ventricular hypertrophy as obtained by unipolar precordial and limb leads. Am Heart J. 1949;37:161-186.

6. Roberts WC, Filardo G, Ko JM, et al. Comparison of total 12-lead QRS voltage in a variety of cardiac conditions and its usefulness in predicting increased cardiac mass. Am J Cardiol. 2013;112:904-909.

7. Cyrille NB, Goldsmith J, Alvarez J, et al. Prevalence and prognosis significance of low QRS voltage among the three main types of cardiac amyloidosis. Am J Cardiol. 2014;114:1089-1093.

8. Carroll JD, Gaasch WH, McAdam KP. Amyloid cardiomyopathy: characterization by a distinctive voltage/mass relation. Am J Cardiol. 1982;49:9-13.

9. Mitchell C, Rahko PS, Blauwet LA, et al. Guidelines for performing a comprehensive transthoracic echocardiographic examination in adults: recommendations from the American Society of Echocardiography. J Am Soc Echocardiogr. 2019;32:1-64.

10. Lang RM, Badano LP, Mor-Avi V, et al. Recommendations for cardiac chamber quantification by echocardiography in adults: an update from the American Society of Echocardiography and the European Association of Cardiovascular Imaging. J Am Soc Echocardiogr. 2015;28:1-39.

11. Canepa M, Pozios I, Vianello PF, et al. Distinguishing ventricular septal bulge versus hypertrophic cardiomyopathy in the elderly. Heart. 2016;102:1087-94.

12. Falk RH, Plehn JF, Deering T, et al. Sensitivity and specificity of the echocardiographic features of cardiac amyloidosis. Am J Cardiol. 1987;59:418-22.

13. Fontana M, Corovic A, Scully P, et al. Myocardial amyloidosis. The exemplar interstitial disease. J Am Coll Cardiol Img. 2019. doi: 10.1016/j.jcmg.2019.06.023. [Epub ahead of print].
